# Supplementary material
Source: PubMed Central journal article supplement (PMC2909316)
Supplement: supp_122_15_2640__1.pdf [file supp_122_15_2640__1.pdf]

**Table S1. Primers used for sqRT-PCR, mutagenesis and genotyping**

| <b>Primer name</b> | <b>Sequence</b>          | <b>Primer name</b> | <b>Sequence</b>                           |
|--------------------|--------------------------|--------------------|-------------------------------------------|
| GAPDH.fwd          | ctcaagattgtcagcaatgcatcc | AnkK38R.mut        | ggccctgtgctttgtgctaaGgcacatccaccaggagctgg |
| GAPDH.rev          | ccagtgatgcaggatgatgttc   | AnkK46R.mut        | ccaccaggagctggacaGggagctgggggagagcgagg    |
| sAnk1.5.fwd        | ggatctccacagcagctgg      | AnkC22G.mut        | gagcttctcctggtcagcGgtcagaacgtgatgcacattg  |
| sAnk1.5.rev        | gctcctgtccagttcctgg      | AnkC34G.mut        | cattgtcagggggtccctgGgctttgtgctaaagcacatcc |
| Obsc_exon2.F       | GAGGTACGAGAGAAAGAGTCTGCT |                    |                                           |
| Obsc_exon3.R       | ACTGGAAGATGGTCAGTGTGTG   | Obsc.F             | taagattctttctgcaagcagtc                   |
| Obsc_exon5.R       | CACCATTTGGATGCTAGTTTCA   | Obsc.R             | agtgtgtttgaggaaggagagag                   |
| Obsc_exon73.F      | AGCGATGAAGAGACCAAGACA    | NeoFRT.R           | aatgggctgaccgcttctcgt                     |
| Obsc_exon77.R      | TCCAGGTAGTGCTGAAGAGGA    |                    |                                           |
| Obsc_exon83.F      | ACTCTGGCCAGTACATGTGTTTT  |                    |                                           |
| Obsc_exon88.R      | CTCCCATGGCTACCATCTACA    |                    |                                           |
| KIAA1639_ex3.R     | ACATCCTCAATAGTGACCTGCAT  |                    |                                           |
| KIAA1639_ex8.F     | GGAAGGCCTACTACTATTTGCAC  |                    |                                           |
| KIAA1639_ex13.R    | ACTTCGAGCAAGAAGGAAGTGTG  |                    |                                           |
| KIAA1639_ex14.F    | ATTGAAGAAGGAGCTCTCAACG   |                    |                                           |
| KIAA1639_ex14.R    | GCCAAAGGCAAAAGTACCATAG   |                    |                                           |

RT-PCR primers are shown on the left panel, mutagenesis and genotyping primers are shown on the right panel. Note that upper case indicates the mutation in the AnkK38R.mut, AnkK46R.mut, AnkC22G.mut and AnkC34G.mut primers.
